# Supplementary material for: Who Gets Help? A National Longitudinal Study of Personal Networks and Pandemic Support Among Older Adults
Source: Oxford University Press journal article supplement (doi:10.1093/geronb/gbac123), 2022-08-24
Supplement: gbac123_suppl_supplementary_appendix.pdf [file gbac123_suppl_supplementary_appendix.pdf]

## Supplemental Appendix

Table S1. Comparison between Analytic Sample and Round 3 Sample Dropped in the COVID-19 Survey

|                           | Analytic sample | Round 3 dropped in<br>COVID-19 survey | Difference |
|---------------------------|-----------------|---------------------------------------|------------|
| N                         | 2622            | 2127                                  |            |
| Age                       | 68.24(9.98)     | 62.79 (12.66)                         |            |
| Female                    | 55.68%          | 52.59%                                | *          |
| Non-white                 | 21.25%          | 31.23%                                | ***        |
| Education                 |                 |                                       |            |
| < <i>High school</i>      | 7.48%           | 15.64%                                | ***        |
| <i>High school</i>        | 21.04%          | 26.31%                                | ***        |
| <i>Some college</i>       | 36.09%          | 37.32%                                |            |
| <i>College</i>            | 35.39%          | 20.73%                                | ***        |
| Marital status            |                 |                                       |            |
| <i>Married</i>            | 71.78%          | 54.68%                                | ***        |
| <i>Cohabiting</i>         | 2.83%           | 5.54%                                 | ***        |
| <i>Separated/divorced</i> | 13.07%          | 19.20%                                | ***        |
| <i>Widowed</i>            | 7.93%           | 12.91%                                | ***        |
| <i>Never married</i>      | 4.39%           | 7.66%                                 | ***        |

\*\*\* p<0.001, \* p<0.05: t-tests comparing continuous variables, tests of proportions comparing categorical variables

Table S2. Estimated Odds Ratios for Pre-pandemic Confidant Network Predicting Needed Pandemic Help/Support (1 = Yes, 0 = No) from Logistic Models (N=2,622)

|                                | Need Help         | Need Support      |
|--------------------------------|-------------------|-------------------|
| <i>Confidant Networks</i>      |                   |                   |
| Size                           | 1.16**<br>(0.06)  | 1.21***<br>(0.05) |
| Density                        | 2.36**<br>(0.66)  | 1.55*<br>(0.29)   |
| % female confidant             | 1.11<br>(0.28)    | 1.30<br>(0.30)    |
| % kin confidant                | 0.98<br>(0.24)    | 1.01<br>(0.17)    |
| <i>Demographics</i>            |                   |                   |
| Female                         | 1.66***<br>(0.20) | 1.49***<br>(0.13) |
| Age                            | 1.06***<br>(0.01) | 1.00<br>(0.01)    |
| Non-white                      | 1.85***<br>(0.28) | 1.61***<br>(0.18) |
| Education (ref: < high school) |                   |                   |
| <i>High school</i>             | 0.54**<br>(0.12)  | 0.87<br>(0.15)    |
| <i>Some college</i>            | 0.54**<br>(0.12)  | 1.19<br>(0.23)    |
| <i>College graduate</i>        | 0.46***<br>(0.10) | 1.53*<br>(0.28)   |
| Marital status (ref: married)  |                   |                   |
| <i>Cohabiting</i>              | 1.75+<br>(0.56)   | 1.91*<br>(0.50)   |
| <i>Divorced/separated</i>      | 2.26***<br>(0.45) | 1.74***<br>(0.23) |
| <i>Widowed</i>                 | 1.70**<br>(0.29)  | 1.58***<br>(0.21) |
| <i>Never Married</i>           | 2.54**<br>(0.82)  | 1.63*<br>(0.38)   |
| Self-rated physical health     | 0.63***<br>(0.04) | 0.89+<br>(0.05)   |
| Self-rated mental health       | 1.00<br>(0.08)    | 0.82**<br>(0.05)  |
| Rely on family                 | 0.90<br>(0.07)    | 0.99<br>(0.07)    |
| Rely on friends                | 0.88<br>(0.07)    | 1.12<br>(0.08)    |
| Interview month (ref: 9/2020)  |                   |                   |
| 10/2020                        | 1.02<br>(0.16)    | 0.93<br>(0.13)    |
| 11/2020                        | 1.32<br>(0.22)    | 1.07<br>(0.15)    |
| 12/2020                        | 1.32<br>(0.30)    | 1.15<br>(0.19)    |
| 01/2021                        | 0.69<br>(0.18)    | 0.67*<br>(0.12)   |

Standard errors in parentheses. \*\*\* p<0.001, \*\* p<0.01, \* p<0.05, + p<0.10

Table S3. Estimated Relative Risk Ratios for Pre-pandemic Confidant Network Predicting Pandemic Support from Multinomial Logistic Models with Recoded Race (1= white, 0 = non-white) (N=2,622)

|                            | Help              |                           | Help Frequency      |                     | Support           |                           | Support Frequency   |                    |
|----------------------------|-------------------|---------------------------|---------------------|---------------------|-------------------|---------------------------|---------------------|--------------------|
|                            | Yes vs. no need   | Unable to get vs. no need | Less often vs. same | More often vs. same | Yes vs. no need   | Unable to get vs. no need | Less often vs. same | More often vs same |
| <i>Confidant Networks</i>  |                   |                           |                     |                     |                   |                           |                     |                    |
| Size                       | 1.39**<br>(0.15)  | 0.77+<br>(0.12)           | 0.93<br>(0.10)      | 1.38*<br>(0.18)     | 1.10<br>(0.09)    | 0.92<br>(0.14)            | 1.03<br>(0.10)      | 1.19+<br>(0.12)    |
| Size X white               | 0.86<br>(0.11)    | 1.08<br>(0.23)            | 1.17<br>(0.16)      | 0.80<br>(0.13)      | 1.13<br>(0.10)    | 1.77*<br>(0.41)           | 0.97<br>(0.11)      | 0.96<br>(0.12)     |
| Density                    | 1.19<br>(0.57)    | 0.75<br>(0.65)            | 2.07<br>(1.06)      | 1.39<br>(0.85)      | 0.73<br>(0.29)    | 0.37<br>(0.29)            | 1.28<br>(0.61)      | 0.79<br>(0.42)     |
| Density X white            | 2.92+<br>(1.75)   | 2.92<br>(3.74)            | 0.30+<br>(0.20)     | 1.34<br>(0.95)      | 2.74*<br>(1.32)   | 3.72<br>(4.30)            | 0.69<br>(0.48)      | 2.06<br>(1.35)     |
| % female confidant         | 0.96<br>(0.43)    | 1.13<br>(0.77)            | 0.79<br>(0.32)      | 1.10<br>(0.58)      | 1.13<br>(0.40)    | 1.12<br>(0.99)            | 0.38+<br>(0.20)     | 1.12<br>(0.60)     |
| % female confidant X white | 1.12<br>(0.58)    | 1.71<br>(1.97)            | 1.08<br>(0.54)      | 0.83<br>(0.52)      | 1.19<br>(0.41)    | 2.21<br>(2.26)            | 2.50<br>(1.60)      | 0.72<br>(0.50)     |
| % kin confidant            | 2.24+<br>(1.01)   | 1.43<br>(1.30)            | 0.84<br>(0.44)      | 1.90<br>(0.93)      | 1.90<br>(0.84)    | 1.94<br>(2.55)            | 1.08<br>(0.57)      | 1.62<br>(0.84)     |
| % kin confidant X white    | 0.37*<br>(0.18)   | 0.25<br>(0.29)            | 2.08<br>(1.36)      | 0.45<br>(0.27)      | 0.45<br>(0.23)    | 0.39<br>(0.59)            | 0.97<br>(0.57)      | 0.57<br>(0.35)     |
| white                      | 0.54***<br>(0.08) | 0.56<br>(0.21)            | 0.56***<br>(0.09)   | 0.49***<br>(0.10)   | 0.65***<br>(0.07) | 0.49+<br>(0.18)           | 0.79<br>(0.13)      | 0.74+<br>(0.13)    |

Standard errors in parentheses. \*\*\* p<0.001, \*\* p<0.01, \* p<0.05, + p<0.10

All models controlled for gender, age, education, current marital status as well as Round 3 measures of self-rated physical health, self-rated mental health, rely on family and rely on friends.
